# Supplementary material
Source: publisher figshare collection journal article supplement (https://acs.figshare.com/ndownloader/files/12486083)
Supplement: Supplementary file 1 [file 12486083 › 1802_Permission_for_Previously_Published_Copyrighted_Material.pdf]

# Permission Request Form: for Use of Previously Published Figures/Tables/Artwork/Photos in ACS LiveSlides from Copyright Owners/Publishers/Photographers Other Than ACS.

If you have questions regarding this form, or if you have receive permissions from publishers via Rightslink, please contact [ACSPubsMultimedia@acs.org](mailto:ACSPubsMultimedia@acs.org)

Date: \_\_\_\_\_

To: \_\_\_\_\_

Publisher's/Copyright Owner's Contact Information

\_\_\_\_\_

\_\_\_\_\_

\_\_\_\_\_

Publisher's/Copyright Owner's Email Address

From: \_\_\_\_\_

Your Name and Complete Mailing Address

\_\_\_\_\_

\_\_\_\_\_

\_\_\_\_\_

Your Phone Number Including Country and City Codes

Your Email Address

Your Specific Deadline Date

I am preparing an *ACS LiveSlides* entitled:

\_\_\_\_\_

to appear with

\_\_\_\_\_

Title of ACS Publication and DOI

which is published by the American Chemical Society, a not-for-profit membership society and a STM signatory.

I would appreciate your permission to use the following material in all formats including but not limited to print, microform, electronic, and/or CD-ROM from the following reference:

**From a journal or magazine:**

| <u>Publication Title</u> | <u>Year</u> | <u>Vol.</u> | <u>No.</u> | <u>Page(s)</u> | <u>Material to be used</u> |
|--------------------------|-------------|-------------|------------|----------------|----------------------------|
|--------------------------|-------------|-------------|------------|----------------|----------------------------|

\_\_\_\_\_

\_\_\_\_\_

\_\_\_\_\_

**From a book:** include book title, series name and number, year, page(s), book editor(s) name(s), chapter author's name(s), and material to be used, such as Figs. 2 & 3, full text, etc.

\_\_\_\_\_

\_\_\_\_\_

\_\_\_\_\_

If you have a required **credit line**, please include it below:

\_\_\_\_\_

\_\_\_\_\_

For your convenience, you may sign and date the bottom of this letter to indicate your agreement. Please return this form to me at the above email address, by the above **deadline date** (if given above). Thank you.

Agreed: \_\_\_\_\_

Publisher's/Copyright Owner's Signature or Stamp

Date: \_\_\_\_\_

Date

**SIGN HERE**

Submit completed and signed form with your signed *ACS LiveSlides* Video Release.

7/25/16
