# Supplementary material
Source: publisher figshare collection journal article supplement (https://acs.figshare.com/ndownloader/files/12486083)
Supplement: Supplementary file 1 [file 12486083 › info.xml]

<presentation>
	<article>
		<title>A Molecular Modelling Study towards the Development of H2S-free Removal of Iron Sulphide Scale from Oil and Gas Wells</title>
		<doi>10.1021/acs.iecr.8b01928</doi>
		<copyright>American Chemical Society</copyright>
		<narrator>Wim Buijs</narrator>
		<contact>Wim Buijs</contact>
		<contact-email>w.buijs@tudelft.nl</contact-email>
		<author-list>
			<author>Wim Buijs</author>
		</author-list>
	</article>
	<slides height-width-ratio=".75">
		<slide audio-time="27">
			<subtitle/>
		</slide>
		<slide audio-time="28">
			<subtitle/>
		</slide>
		<slide audio-time="21">
			<subtitle/>
		</slide>
		<slide audio-time="45">
			<subtitle/>
		</slide>
		<slide audio-time="67">
			<subtitle/>
		</slide>
		<slide audio-time="45">
			<subtitle/>
		</slide>
		<slide audio-time="32">
			<subtitle/>
		</slide>
		<slide audio-time="20">
			<subtitle/>
		</slide>
	</slides>
	<audio duration="285"/>
</presentation>
